# FOCUS

THE JOURNAL OF LIFELONG LEARNING IN PSYCHIATRY



## *Posttraumatic Stress Disorder and Disaster Psychiatry*

*Guest Editor, Anand Pandya, M.D.*

### IN CLINICAL SYNTHESIS:

Adult Disaster Psychiatry

*Anand Pandya, M.D.*

Posttraumatic Stress Disorder:  
From Phenomenology to Clinical Practice

*David M. Benedek, M.D.*

*Robert J. Ursano, M.D.*

Guideline Watch (March 2009):  
American Psychiatric Association Practice Guideline  
for the Treatment of Patients with Acute Stress  
Disorder and Posttraumatic Stress Disorder

### SPECIAL FEATURE IN THIS ISSUE

Earn up to five additional hours of CME credit through the use of

Performance in Practice:

Clinical Tools to Improve the Care of Patients with

**Posttraumatic Stress Disorder**
